# Supplementary material for: Solubility and size of polymer nanoparticles
Source: Royal Society of Chemistry journal article supplement (doi:10.1039/c8py00829a), 2018-01-01
Supplement: c8py00829a1.xlsx [file c8py00829a1.xlsx]

## Sheet: A1 100
Combined 100 water. Data collected over several experiments, only those with count >1000 are shown.
Record	Type	Sample Name	Measurement Date and Time	Z-Ave	PdI	Pk 1 Mean Int	Pk 2 Mean Int	Pk 3 Mean Int	Pk 1 Area Int	Pk 2 Area Int	Peak 3 Area Intensity	Number Mean	Derived Count Rate
				d.nm		d.nm	d.nm	d.nm	%	%	%	d.nm	kcps
22	Size	100_NT2_3_1 4	2017-06-01 19:32:10	203.9	0.198	213.8	5237	0	98.4	1.6	0	152.1	7972.7
21	Size	100_NT2_3_1 3	2017-06-01 19:30:48	196.2	0.227	206	5396	0	98.8	1.2	0	132.4	8006.8
24	Size	100_NT2_3_1 6	2017-06-01 19:34:52	211.2	0.229	208	0	0	100	0	0	168.8	7924
20	Size	100_NT2_3_1 2	2017-06-01 19:29:27	189	0.262	183.7	0	0	100	0	0	134.8	8141.2
18	Size	100_NT2_2_1 6	2017-06-01 19:11:52	240.8	0.27	204.1	0	0	100	0	0	187.2	4976.6
11	Size	100_NT2_1_1 5	2017-06-01 18:47:10	238.9	0.278	194.4	0	0	100	0	0	182.3	5365.7
19	Size	100_NT2_3_1 1	2017-06-01 19:28:05	173.4	0.278	159.3	0	0	100	0	0	125	8411.9
23	Size	100_NT2_3_1 5	2017-06-01 19:33:31	213.2	0.292	185	0	0	100	0	0	161.2	8002.3
		100_NT3_1 4	2017-06-02 14:17:38	274.9	0.3	201	0	0	100	0	0	192.6	1165.9
		100_NT3_3 6	2017-06-02 14:56:21	226.8	0.309	152.1	0	0	100	0	0	133.4	1871.8
		100_NT3_1 1	42888.6	261.3	0.318	204.8	0	0	100	0	0	194.9	1121.7
		100_NT3_1 2	42888.6	298	0.318	189	0	0	100	0	0	178.9	1116.8
		100_NT3_3 4	2017-06-02 14:53:53	242	0.338	140.6	0	0	100	0	0	120	1724.3
11	Size	100_NT1_2 5	42888.7	295.6	0.352	210.8	0	0	100	0	0	190.9	1309.6
7	Size	100_NT2_1_1 1	2017-06-01 18:41:45	225.7	0.356	183.8	0	0	100	0	0	173.4	5324.3
12	Size	100_NT1_2 6	42888.7	359.2	0.363	221.8	0	0	100	0	0	208.1	1447
12	Size	100_NT2_1_1 6	2017-06-01 18:48:31	232.4	0.363	191.6	0	0	100	0	0	180.5	5295.3
18	Size	100_NT1_3 6	42888.7	356.8	0.368	207	0	0	100	0	0	197.3	1896.2
9	Size	100_NT2_1_1 3	2017-06-01 18:44:27	284.3	0.369	178.9	0	0	100	0	0	170.5	5708.9
13	Size	100_NT2_2_1 1	2017-06-01 19:05:06	232.7	0.371	183	0	0	100	0	0	171.3	5162.2
		100_NT3_1 3	42888.6	352.8	0.376	184.9	0	0	100	0	0	180.5	1246.2
		100_NT3_3 3	2017-06-02 14:52:39	279.1	0.38	150.4	0	0	100	0	0	131	1842.8
		100_NT3_3 5	2017-06-02 14:55:07	192.2	0.381	164	0	0	100	0	0	129.8	1768.9
17	Size	100_NT2_2_1 5	2017-06-01 19:10:31	252.9	0.39	195.9	0	0	100	0	0	183.7	5125.5

## Sheet: A1 95
Record	Type	Sample Name	Measurement Date and Time	Z-Ave	PdI	Pk 1 Mean Int	Pk 2 Mean Int	Pk 3 Mean Int	Pk 1 Area Int	Pk 2 Area Int	Peak 3 Area Intensity	Number Mean	Derived Count Rate
				d.nm		d.nm	d.nm	d.nm	%	%	%	d.nm	kcps
9	Size	171127_95pc_1C 1	2017-11-28 17:17:56	213.5	0.059	219.7	0	0	100	0	0	208.2	2475
10	Size	171127_95pc_1C 2	2017-11-28 17:18:34	206.8	0.106	204.7	0	0	100	0	0	188.8	2421.7
11	Size	171127_95pc_1C 3	2017-11-28 17:19:13	209.6	0.054	215.2	0	0	100	0	0	198.9	2445
12	Size	171127_95pc_1C 4	2017-11-28 17:19:52	202.2	0.131	199.2	0	0	100	0	0	174.8	2330.6
13	Size	171127_95pc_1C 5	2017-11-28 17:20:31	205.2	0.068	217.1	0	0	100	0	0	204.4	2306.4
14	Size	171127_95pc_1C 6	2017-11-28 17:21:09	209.3	0.159	247.4	0	0	100	0	0	202.1	2341.6
15	Size	171127_95pc_1C 7	2017-11-28 17:21:48	206.4	0.124	208.9	0	0	100	0	0	193	2295.2
16	Size	171127_95pc_1C 8	2017-11-28 17:22:27	201	0.145	216.7	0	0	100	0	0	158.4	2295.6
12	Size	171129_95pc_1C 1	2017-12-02 10:33:55	222.9	0.219	212.3	0	0	100	0	0	202.2	3435.2
13	Size	171129_95pc_1C 2	2017-12-02 10:34:34	221	0.192	217.6	0	0	100	0	0	203	3456.8
14	Size	171129_95pc_1C 3	2017-12-02 10:35:13	222.9	0.193	234.8	78.23	0	94.7	5.3	0	96.49	3395.6
15	Size	171129_95pc_1C 4	2017-12-02 10:35:51	227.9	0.186	186.6	449.8	0	59.7	40.3	0	165.4	3377.3
16	Size	171129_95pc_1C 5	2017-12-02 10:36:30	227.2	0.218	255.6	90.91	0	90.2	9.8	0	107.8	3403.9
17	Size	171129_95pc_1C 6	2017-12-02 10:37:09	224.3	0.208	229.4	0	0	100	0	0	163.7	3389.5
18	Size	171129_95pc_1C 7	2017-12-02 10:37:48	226.5	0.14	263.4	61.58	0	94.8	5.2	0	66.63	3372.4
19	Size	171129_95pc_1C 8	2017-12-02 10:38:26	224.2	0.191	214.5	0	0	100	0	0	203	3373.2
20	Size	171129_95pc_1C 1	2017-12-02 10:50:14	208.3	0.203	248.3	102.4	0	82	18	0	114.3	3231.1
21	Size	171129_95pc_1C 2	2017-12-02 10:50:53	214.6	0.225	206.2	0	0	100	0	0	186.1	3219.3
22	Size	171129_95pc_1C 3	2017-12-02 10:51:32	218.4	0.181	228.7	0	0	100	0	0	197.4	3223.7
23	Size	171129_95pc_1C 4	2017-12-02 10:52:10	224	0.155	262.9	0	0	100	0	0	131.3	3167.4
24	Size	171129_95pc_1C 5	2017-12-02 10:52:49	228.1	0.286	196	0	0	100	0	0	191.2	3245.8
25	Size	171129_95pc_1C 6	2017-12-02 10:53:28	227.6	0.166	258.9	76.42	0	93.2	6.8	0	87.83	3136.7
26	Size	171129_95pc_1C 7	2017-12-02 10:54:07	222.8	0.181	221.9	0	0	100	0	0	200.2	3157.5
27	Size	171129_95pc_1C 8	2017-12-02 10:54:45	218.5	0.187	317.6	143.2	0	66.2	33.8	0	135.5	3194.9
28	Size	171129_95pc_1C 1	2017-12-02 11:22:31	211.5	0.222	193.2	0	0	100	0	0	185.9	3396.1
29	Size	171129_95pc_1C 2	2017-12-02 11:23:10	218.8	0.137	213.8	0	0	100	0	0	204	3300.1
30	Size	171129_95pc_1C 3	2017-12-02 11:23:48	222	0.215	213.4	0	0	100	0	0	195.8	3223.4
31	Size	171129_95pc_1C 4	2017-12-02 11:24:27	224.9	0.194	319.7	123.3	0	76.2	23.8	0	126.5	3301.8
32	Size	171129_95pc_1C 5	2017-12-02 11:25:06	222.2	0.166	252.1	1793	0	96.8	3.2	0	156	3271.5
33	Size	171129_95pc_1C 6	2017-12-02 11:25:45	224.7	0.19	262.1	89.62	0	90.1	9.9	0	103.5	3268.6
34	Size	171129_95pc_1C 7	2017-12-02 11:26:23	233	0.146	279.9	83.29	0	92	8	0	95.31	3306.6
35	Size	171129_95pc_1C 8	2017-12-02 11:27:02	227.8	0.194	224.6	0	0	100	0	0	207.9	3270.3
36	Size	171129_95pc_1C 1	2017-12-02 11:29:00	231.6	0.176	224	0	0	100	0	0	199.6	3354.5
37	Size	171129_95pc_1C 2	2017-12-02 11:29:38	235.6	0.106	251.1	0	0	100	0	0	231.1	3334.5
38	Size	171129_95pc_1C 3	2017-12-02 11:30:17	234.7	0.192	220.6	918.6	0	96.5	3.5	0	198.2	3247.6
39	Size	171129_95pc_1C 4	2017-12-02 11:30:56	234.7	0.143	231.9	1801	0	91.9	8.1	0	202.5	3345
40	Size	171129_95pc_1C 5	2017-12-02 11:31:34	238.2	0.179	235.7	0	0	100	0	0	224	3461.4
41	Size	171129_95pc_1C 6	2017-12-02 11:32:13	250.2	0.118	270.9	0	0	100	0	0	241.5	3526.4
42	Size	171129_95pc_1C 7	2017-12-02 11:32:52	242.3	0.116	246.7	0	0	100	0	0	230.7	3513.5
43	Size	171129_95pc_1C 8	2017-12-02 11:33:30	244.9	0.149	251.4	0	0	100	0	0	230.1	3370.5
25	Size	171203_95pc_1C 1	2017-12-22 08:01:53	185.3	0.012	188.3	0	0	100	0	0	182	3389.2
26	Size	171203_95pc_1C 2	2017-12-22 08:02:32	186.4	0.029	194.1	0	0	100	0	0	180.5	3395.3
27	Size	171203_95pc_1C 3	2017-12-22 08:03:11	182.1	0.135	199.1	0	0	100	0	0	161.3	3434.3
28	Size	171203_95pc_1C 4	2017-12-22 08:03:49	186.9	0.066	202.5	0	0	100	0	0	154	3501.8
29	Size	171203_95pc_1C 5	2017-12-22 08:04:28	179.1	0.074	195.3	0	0	100	0	0	168.7	3375.7
30	Size	171203_95pc_1C 6	2017-12-22 08:05:07	181.8	0.13	180.6	1574	0	93.1	6.9	0	154	3367.3
31	Size	171203_95pc_1C 7	2017-12-22 08:05:46	177.2	0.164	171.2	0	0	100	0	0	154.7	3354.9
32	Size	171203_95pc_1C 8	2017-12-22 08:06:24	173.2	0.203	165	1398	5387	96.9	1.9	1.2	143.8	3453
33	Size	171203_95pc_1C 1	2017-12-22 08:18:19	173.4	0.207	165.1	0	0	100	0	0	150.3	3006.7
34	Size	171203_95pc_1C 2	2017-12-22 08:18:57	165.5	0.118	164.6	0	0	100	0	0	142.5	2902.8
35	Size	171203_95pc_1C 3	2017-12-22 08:19:36	170.3	0.141	175.7	0	0	100	0	0	151.6	2924.7
36	Size	171203_95pc_1C 4	2017-12-22 08:20:14	172.6	0.127	194.3	0	0	100	0	0	153.9	3006.9
37	Size	171203_95pc_1C 5	2017-12-22 08:20:53	174.2	0.095	176.3	0	0	100	0	0	162.3	2944.9
38	Size	171203_95pc_1C 6	2017-12-22 08:21:32	171	0.232	156	0	0	100	0	0	146.7	2693
39	Size	171203_95pc_1C 7	2017-12-22 08:22:11	176.2	0.212	162.4	0	0	100	0	0	152.8	2789.3
40	Size	171203_95pc_1C 8	2017-12-22 08:22:49	173.4	0.096	183.9	0	0	100	0	0	156.6	2888.6

## Sheet: A1 90
Record	Type	Sample Name	Measurement Date and Time	Z-Ave	PdI	Pk 1 Mean Int	Pk 2 Mean Int	Pk 3 Mean Int	Pk 1 Area Int	Pk 2 Area Int	Peak 3 Area Intensity	Number Mean	Derived Count Rate
				d.nm		d.nm	d.nm	d.nm	%	%	%	d.nm	kcps
1	Size	171116_90pc_1C 1	2017-11-20 17:47:22	159.4	0.114	165.1	480.5	0	92	8	0	129.4	2972.1
2	Size	171116_90pc_1C 2	2017-11-20 17:48:01	160.2	0.083	166.7	0	0	100	0	0	149.3	2928.1
3	Size	171116_90pc_1C 3	2017-11-20 17:48:39	171.5	0.038	180.1	0	0	100	0	0	164.2	2983.8
4	Size	171116_90pc_1C 4	2017-11-20 17:49:18	171.3	0.082	171.6	0	0	100	0	0	157.5	2958.5
5	Size	171116_90pc_1C 5	2017-11-20 17:49:57	168.4	0.042	175.5	0	0	100	0	0	165.5	2860.6
6	Size	171116_90pc_1C 6	2017-11-20 17:50:35	164.6	0.073	172	0	0	100	0	0	149.9	2834.8
7	Size	171116_90pc_1C 7	2017-11-20 17:51:14	171.6	0.06	180.5	0	0	100	0	0	161.5	2762.9
8	Size	171116_90pc_1C 8	2017-11-20 17:51:52	161.7	0.088	167.8	0	0	100	0	0	141.9	2646.1
1	Size	171218_90pc_1C 1	2017-12-20 13:14:25	177.7	0.172	190.2	0	0	100	0	0	188.5	1472.6
2	Size	171218_90pc_1C 2	2017-12-20 13:15:04	224.8	0.174	219.8	0	0	100	0	0	214.6	1466.8
3	Size	171218_90pc_1C 3	2017-12-20 13:15:43	215.3	0.065	230.4	0	0	100	0	0	218.5	1448.8
4	Size	171218_90pc_1C 4	2017-12-20 13:16:21	219.2	0.19	264	45.05	0	94.6	5.4	0	45.88	1433.2
5	Size	171218_90pc_1C 5	2017-12-20 13:17:00	221.2	0.238	252.1	76.35	0	90.4	9.6	0	80.14	1438.9
6	Size	171218_90pc_1C 6	2017-12-20 13:17:39	214.2	0.266	188.3	2651	0	82.7	17.3	0	172.2	1465.8
7	Size	171218_90pc_1C 7	2017-12-20 13:18:18	228.3	0.191	293.1	81.15	0	89.4	10.6	0	85.43	1534.5
8	Size	171218_90pc_1C 8	2017-12-20 13:18:57	234	0.166	242.6	0	0	100	0	0	229.9	1484.5
9	Size	171218_90pc_1C 1	2017-12-20 13:42:53	174.2	0.138	183.5	0	0	100	0	0	180	1331.7
10	Size	171218_90pc_1C 2	2017-12-20 13:43:31	190.9	0.137	227.2	72.95	0	92.8	7.2	0	78.99	1347
11	Size	171218_90pc_1C 3	2017-12-20 13:44:10	190.8	0.105	212	0	0	100	0	0	200	1290.5
12	Size	171218_90pc_1C 4	2017-12-20 13:44:48	182.9	0.262	279.6	75.35	0	79.6	20.4	0	73.14	1268.3
13	Size	171218_90pc_1C 5	2017-12-20 13:45:27	192.1	0.234	299.2	99.86	0	73.8	26.2	0	94.41	1343.7
14	Size	171218_90pc_1C 6	2017-12-20 13:46:05	199.3	0.21	239.2	44.77	0	94.9	5.1	0	43.78	1366.2
15	Size	171218_90pc_1C 7	2017-12-20 13:46:44	202.6	0.255	226.9	66.32	0	89.2	10.8	0	68.9	1295
16	Size	171218_90pc_1C 8	2017-12-20 13:47:22	205.2	0.263	197.1	0	0	100	0	0	182.9	1235.1
17	Size	171218_90pc_1C 1	2017-12-20 15:10:05	147.6	0.101	147.5	0	0	100	0	0	146.3	1175.9
18	Size	171218_90pc_1C 2	2017-12-20 15:10:44	162.7	0.031	169.2	0	0	100	0	0	158.2	1105.7
19	Size	171218_90pc_1C 3	2017-12-20 15:11:23	160.3	0.157	175.6	0	0	100	0	0	94.73	1050.1
20	Size	171218_90pc_1C 4	2017-12-20 15:12:01	154.2	0.14	170.1	0	0	100	0	0	148.4	1028.5
21	Size	171218_90pc_1C 5	2017-12-20 15:12:40	158.6	0.168	190.7	45.55	0	93.6	6.4	0	45.2	1007.4
22	Size	171218_90pc_1C 6	2017-12-20 15:13:19	155	0.182	167.5	5200	0	98.7	1.3	0	118.9	997.3
23	Size	171218_90pc_1C 7	2017-12-20 15:13:57	160.1	0.209	196.3	82.17	0	83.1	16.9	0	79.16	1003.6
24	Size	171218_90pc_1C 8	2017-12-20 15:14:36	158.3	0.241	208.3	4769	0	98.7	1.3	0	87.63	1004.9
1	Size	180207_90pc_1C 1	2018-02-08 08:37:34	187.8	0.073	190.3	0	0	100	0	0	172.6	24599.7
2	Size	180207_90pc_1C 2	2018-02-08 08:38:13	186.3	0.014	194.1	0	0	100	0	0	169.3	24934
3	Size	180207_90pc_1C 3	2018-02-08 08:38:52	185	0.06	196	0	0	100	0	0	166.2	24762.5
4	Size	180207_90pc_1C 4	2018-02-08 08:39:31	184.7	0.108	195.1	0	0	100	0	0	154.9	24982.9
5	Size	180207_90pc_1C 5	2018-02-08 08:40:10	186.1	0.071	199.1	0	0	100	0	0	162.9	25641.1
6	Size	180207_90pc_1C 6	2018-02-08 08:40:49	186.9	0.013	194.5	0	0	100	0	0	169.5	26008.7
7	Size	180207_90pc_1C 7	2018-02-08 08:41:27	188.1	0.045	198.3	0	0	100	0	0	169.2	25342.5
8	Size	180207_90pc_1C 8	2018-02-08 08:42:06	188.9	0.004	196.1	0	0	100	0	0	169.2	25390.5
9	Size	180207_90pc_1C 9	2018-02-08 08:42:45	185.3	0.009	192.5	0	0	100	0	0	168.2	24663.8
10	Size	180207_90pc_1C 10	2018-02-08 08:43:24	186.2	0.044	190.7	0	0	100	0	0	168.9	24796.2
11	Size	180207_90pc_1C 11	2018-02-08 08:44:02	185.1	0.034	196.1	0	0	100	0	0	159.5	24880.4
12	Size	180207_90pc_1C 12	2018-02-08 08:44:41	184.8	0.015	190.7	0	0	100	0	0	167.6	24218.9
13	Size	180207_90pc_1C 13	2018-02-08 08:45:19	187.1	0.019	193.5	0	0	100	0	0	167.4	24437.8
14	Size	180207_90pc_1C 14	2018-02-08 08:45:58	186.7	0.019	194.7	0	0	100	0	0	169	24454.9
15	Size	180207_90pc_1C 1	2018-02-08 09:02:01	179.7	0.002	186.1	0	0	100	0	0	163.4	4500.1
16	Size	180207_90pc_1C 2	2018-02-08 09:02:40	183.3	0.061	194.3	0	0	100	0	0	166.1	4537.2
17	Size	180207_90pc_1C 3	2018-02-08 09:03:18	186.4	0.089	206	0	0	100	0	0	148.5	4486.4
18	Size	180207_90pc_1C 4	2018-02-08 09:03:57	184.9	0.03	194.5	0	0	100	0	0	164.9	4399.8
19	Size	180207_90pc_1C 5	2018-02-08 09:04:36	179.6	0.095	193.4	0	0	100	0	0	152.6	4278.5
20	Size	180207_90pc_1C 6	2018-02-08 09:05:14	187.4	0.031	196.6	0	0	100	0	0	168.7	4380.8
21	Size	180207_90pc_1C 7	2018-02-08 09:05:53	185.5	0.052	195.7	0	0	100	0	0	167.7	4364.9
22	Size	180207_90pc_1C 8	2018-02-08 09:06:32	182.8	0.058	193.1	0	0	100	0	0	166.5	4407.5
23	Size	180207_90pc_1C 9	2018-02-08 09:07:11	180.7	0.099	195.5	0	0	100	0	0	158.4	4359.1
24	Size	180207_90pc_1C 10	2018-02-08 09:07:50	180.5	0.074	190.9	0	0	100	0	0	166.4	4362.4
25	Size	180207_90pc_1C 11	2018-02-08 09:08:29	181.2	0.071	192.3	0	0	100	0	0	164.5	4356.3
26	Size	180207_90pc_1C 12	2018-02-08 09:09:07	177.5	0.02	184.6	0	0	100	0	0	161.9	4262.7
27	Size	180207_90pc_1C 13	2018-02-08 09:09:46	190.1	0.028	198.6	0	0	100	0	0	173.3	4377.1
28	Size	180207_90pc_1C 14	2018-02-08 09:10:25	182.4	0.094	196.6	0	0	100	0	0	162.2	4309.7
29	Size	180207_90pc_1C 1	2018-02-08 10:28:43	200.3	0.002	206.9	0	0	100	0	0	186.1	11448.1
30	Size	180207_90pc_1C 2	2018-02-08 10:29:22	197.8	0.029	207	0	0	100	0	0	180	11397.7
31	Size	180207_90pc_1C 3	2018-02-08 10:30:01	196.2	0.155	208.9	0	0	100	0	0	172.3	11459.2
32	Size	180207_90pc_1C 4	2018-02-08 10:30:39	199	0.01	205.9	0	0	100	0	0	180.5	11582
33	Size	180207_90pc_1C 5	2018-02-08 10:31:18	204.8	0.002	212	0	0	100	0	0	188.3	11579
34	Size	180207_90pc_1C 6	2018-02-08 10:31:57	200.7	0.03	210.3	0	0	100	0	0	182.2	11513.6
35	Size	180207_90pc_1C 7	2018-02-08 10:32:36	188.8	0.076	200.2	0	0	100	0	0	169.5	11511.5
36	Size	180207_90pc_1C 8	2018-02-08 10:33:15	202.6	0.01	213.3	0	0	100	0	0	176.9	11553.6
37	Size	180207_90pc_1C 9	2018-02-08 10:33:54	196.7	0.041	206.8	0	0	100	0	0	178.8	11396.4
38	Size	180207_90pc_1C 10	2018-02-08 10:34:33	203.2	0.37	148.9	0	0	100	0	0	139.6	11438.7
39	Size	180207_90pc_1C 11	2018-02-08 10:35:11	192.6	0.021	200	0	0	100	0	0	179.7	11393.6
40	Size	180207_90pc_1C 12	2018-02-08 10:35:50	197.5	0.222	177.8	0	0	100	0	0	161.7	11218.2
41	Size	180207_90pc_1C 13	2018-02-08 10:36:29	192	0.114	206.4	0	0	100	0	0	177.4	11272.2
42	Size	180207_90pc_1C 14	2018-02-08 10:37:08	200	0.002	207.9	0	0	100	0	0	181.4	11352.8
43	Size	180207_90pc_1C 1	2018-02-08 13:14:15	200.9	0.019	211.9	0	0	100	0	0	176.3	10825.8
44	Size	180207_90pc_1C 2	2018-02-08 13:14:53	201	0.029	212.6	0	0	100	0	0	177.1	10494.7
45	Size	180207_90pc_1C 3	2018-02-08 13:15:32	196.6	0.007	204.3	0	0	100	0	0	178.2	10482
46	Size	180207_90pc_1C 4	2018-02-08 13:16:11	196.7	0.044	207.1	0	0	100	0	0	177.7	10667.3
47	Size	180207_90pc_1C 5	2018-02-08 13:16:50	206.7	0.02	215.9	0	0	100	0	0	188.2	10690.8
48	Size	180207_90pc_1C 6	2018-02-08 13:17:29	198.8	0.041	210.1	0	0	100	0	0	178.2	10683
49	Size	180207_90pc_1C 7	2018-02-08 13:18:07	204.6	0.022	213.6	0	0	100	0	0	189.2	10814.8
50	Size	180207_90pc_1C 8	2018-02-08 13:18:46	199.9	0.03	208.3	0	0	100	0	0	185.9	10941.3
51	Size	180207_90pc_1C 9	2018-02-08 13:19:25	196.7	0.089	214.3	0	0	100	0	0	166.4	10638.9
52	Size	180207_90pc_1C 10	2018-02-08 13:20:04	201.9	0.101	217.7	0	0	100	0	0	165.4	10967.7
53	Size	180207_90pc_1C 11	2018-02-08 13:20:43	203.2	0.075	217.2	0	0	100	0	0	182.8	10940.5
54	Size	180207_90pc_1C 12	2018-02-08 13:21:22	204.2	0.021	209.7	0	0	100	0	0	189	10600.6
55	Size	180207_90pc_1C 13	2018-02-08 13:22:00	200.3	0.042	211	0	0	100	0	0	181.2	10566.5
56	Size	180207_90pc_1C 14	2018-02-08 13:22:39	202.5	0.027	210.6	0	0	100	0	0	188.7	10602.4

## Sheet: A1 85
Record	Type	Sample Name	Measurement Date and Time	Z-Ave	PdI	Pk 1 Mean Int	Pk 2 Mean Int	Pk 3 Mean Int	Pk 1 Area Int	Pk 2 Area Int	Peak 3 Area Intensity	Number Mean	Derived Count Rate
				d.nm		d.nm	d.nm	d.nm	%	%	%	d.nm	kcps
25	Size	171127_85pc_1C 1	2017-11-28 16:13:01	158	0.074	161.9	0	0	100	0	0	148.4	3539.8
26	Size	171127_85pc_1C 2	2017-11-28 16:13:40	161.6	0.031	166	0	0	100	0	0	153.7	3502.3
27	Size	171127_85pc_1C 3	2017-11-28 16:14:18	161.8	0.08	168.5	0	0	100	0	0	153.2	3642.6
28	Size	171127_85pc_1C 4	2017-11-28 16:14:57	164.7	0.081	168.3	0	0	100	0	0	154.7	3686.1
29	Size	171127_85pc_1C 5	2017-11-28 16:15:36	152.9	0.204	161.9	0	0	100	0	0	157.1	3684
30	Size	171127_85pc_1C 6	2017-11-28 16:16:14	155.7	0.18	146.8	0	0	100	0	0	139	3659.9
31	Size	171127_85pc_1C 7	2017-11-28 16:16:53	167.8	0.067	179.9	0	0	100	0	0	162.8	3702.2
32	Size	171127_85pc_1C 8	2017-11-28 16:17:32	165.9	0.062	176.9	0	0	100	0	0	158.1	3684.8
1	Size	171205_85pc_1C_1 1	2017-12-06 09:23:45	164.5	0.161	160.2	0	0	100	0	0	147.9	2575.9
2	Size	171205_85pc_1C_1 2	2017-12-06 09:24:24	167	0.075	171.7	0	0	100	0	0	161.1	2660
3	Size	171205_85pc_1C_1 3	2017-12-06 09:25:03	172.8	0.167	162.7	0	0	100	0	0	151.2	2674.4
4	Size	171205_85pc_1C_1 4	2017-12-06 09:25:41	169.8	0.168	161.1	0	0	100	0	0	154.2	2678.9
5	Size	171205_85pc_1C_1 5	2017-12-06 09:26:20	178.4	0.086	176.7	0	0	100	0	0	165.3	2722.1
6	Size	171205_85pc_1C_1 6	2017-12-06 09:26:59	172.3	0.17	164.8	0	0	100	0	0	152.2	2648.2
7	Size	171205_85pc_1C_1 7	2017-12-06 09:27:38	176.3	0.078	178.6	0	0	100	0	0	163.7	2753.7
8	Size	171205_85pc_1C_1 8	2017-12-06 09:28:17	175.4	0.143	170.4	0	0	100	0	0	159.1	2495.3
9	Size	171205_85pc_1C_1 1	2017-12-06 09:30:10	171.4	0.087	179.2	0	0	100	0	0	153.9	2626.1
10	Size	171205_85pc_1C_1 2	2017-12-06 09:30:49	175.6	0.117	190.3	0	0	100	0	0	162.7	2615.4
11	Size	171205_85pc_1C_1 3	2017-12-06 09:31:28	171.5	0.157	165.8	0	0	100	0	0	156.9	2607.5
12	Size	171205_85pc_1C_1 4	2017-12-06 09:32:07	171.6	0.168	166.6	0	0	100	0	0	152.4	2645.5
13	Size	171205_85pc_1C_1 5	2017-12-06 09:32:46	176.2	0.041	179.1	0	0	100	0	0	169.5	2639.8
14	Size	171205_85pc_1C_1 6	2017-12-06 09:33:25	173.6	0.133	180	0	0	100	0	0	154.6	2651.2
15	Size	171205_85pc_1C_1 7	2017-12-06 09:34:03	177.5	0.17	208.2	77.6	0	91.3	8.7	0	82.45	2666.4
16	Size	171205_85pc_1C_1 8	2017-12-06 09:34:42	175.3	0.134	172.6	0	0	100	0	0	157.8	2691.6
17	Size	171205_85pc_1C_1 1	2017-12-06 09:46:06	173	0.105	176.5	0	0	100	0	0	158.3	2523.6
18	Size	171205_85pc_1C_1 2	2017-12-06 09:46:45	194.9	0.309	153.9	0	0	100	0	0	151.7	2616.3
19	Size	171205_85pc_1C_1 3	2017-12-06 09:47:23	185.4	0.343	147.7	0	0	100	0	0	145.5	2625
20	Size	171205_85pc_1C_1 4	2017-12-06 09:48:02	251.8	0.547	114.9	0	0	100	0	0	112.5	2734.8
21	Size	171205_85pc_1C_1 5	2017-12-06 09:48:41	186.4	0.233	160.2	0	0	100	0	0	155.9	2577.9
22	Size	171205_85pc_1C_1 6	2017-12-06 09:49:19	189.4	0.381	139.6	0	0	100	0	0	138.5	2531.6
23	Size	171205_85pc_1C_1 7	2017-12-06 09:49:58	171.6	0.123	176	0	0	100	0	0	168.6	2447.7
24	Size	171205_85pc_1C_1 8	2017-12-06 09:50:37	179.5	0.152	164.3	0	0	100	0	0	159.4	2385.7
25	Size	171205_85pc_1C_1 1	2017-12-06 10:07:44	567.8	0.117	598.5	0	0	100	0	0	599.1	5493.1
26	Size	171205_85pc_1C_1 2	2017-12-06 10:08:22	643.2	0.179	678.5	0	0	100	0	0	679.8	5359.2
27	Size	171205_85pc_1C_1 3	2017-12-06 10:09:01	598	0.181	599.4	0	0	100	0	0	598.9	5316.8
28	Size	171205_85pc_1C_1 4	2017-12-06 10:09:40	603.4	0.277	612.2	0	0	100	0	0	613.3	5130.4
29	Size	171205_85pc_1C_1 5	2017-12-06 10:10:18	605.6	0.226	638.7	0	0	100	0	0	639.1	5185.8
30	Size	171205_85pc_1C_1 6	2017-12-06 10:10:57	619.2	0.253	606.1	0	0	100	0	0	606.7	5022.4
31	Size	171205_85pc_1C_1 7	2017-12-06 10:11:36	624.9	0.226	623.3	0	0	100	0	0	625.9	5384.7
32	Size	171205_85pc_1C_1 8	2017-12-06 10:12:15	566.4	0.378	488	0	0	100	0	0	485.5	5248.1
1	Size	171219_95pc_1C 1	2017-12-21 14:07:37	166.4	0.05	166.8	0	0	100	0	0	157.7	13115.5
2	Size	171219_95pc_1C 2	2017-12-21 14:08:15	167.8	0.007	171.5	0	0	100	0	0	158.8	12706.7
3	Size	171219_95pc_1C 3	2017-12-21 14:08:54	178.4	0.034	186.3	0	0	100	0	0	174.2	12730.1
4	Size	171219_95pc_1C 4	2017-12-21 14:09:32	181.1	0.129	184.7	0	0	100	0	0	171.7	12541.4
5	Size	171219_95pc_1C 5	2017-12-21 14:10:11	173.9	0.073	176.4	0	0	100	0	0	167.4	12606.6
6	Size	171219_95pc_1C 6	2017-12-21 14:10:49	172.6	0.093	191.1	67.83	0	98.4	1.6	0	100.4	12591.9
7	Size	171219_95pc_1C 7	2017-12-21 14:11:28	181.6	0.061	183	0	0	100	0	0	174.2	12116.5
8	Size	171219_95pc_1C 8	2017-12-21 14:12:07	173	0.045	182.2	0	0	100	0	0	172.2	12331.7
9	Size	171219_95pc_1C 1	2017-12-21 14:13:21	174	0.056	173.4	0	0	100	0	0	160.4	12323
10	Size	171219_95pc_1C 2	2017-12-21 14:14:00	173.9	0.009	177.7	0	0	100	0	0	168.5	12104.1
11	Size	171219_95pc_1C 3	2017-12-21 14:14:39	173.3	0.181	171	0	0	100	0	0	161.8	11900.3
12	Size	171219_95pc_1C 4	2017-12-21 14:15:17	174.6	0.141	186.3	0	0	100	0	0	163.3	12109.9
13	Size	171219_95pc_1C 5	2017-12-21 14:15:56	174.1	0.045	181.9	0	0	100	0	0	171.4	12218.1
14	Size	171219_95pc_1C 6	2017-12-21 14:16:35	176.9	0.137	193.8	79.6	0	93.5	6.5	0	95.65	12078.4
15	Size	171219_95pc_1C 7	2017-12-21 14:17:13	180.4	0.117	188.3	0	0	100	0	0	169.3	11950.4
16	Size	171219_95pc_1C 8	2017-12-21 14:17:52	177.1	0.038	184.1	0	0	100	0	0	173.7	11866.9
17	Size	171219_95pc_1C 1	2017-12-21 14:21:08	175.4	0.104	198	0	0	100	0	0	136.4	12109.2
18	Size	171219_95pc_1C 2	2017-12-21 14:21:47	167.8	0.045	174.4	0	0	100	0	0	157.7	11890.1
19	Size	171219_95pc_1C 3	2017-12-21 14:22:26	170.3	0.154	165.5	0	0	100	0	0	152.2	12088.1
20	Size	171219_95pc_1C 4	2017-12-21 14:23:04	169.5	0.074	180.7	0	0	100	0	0	160.3	11910.2
21	Size	171219_95pc_1C 5	2017-12-21 14:23:42	173	0.123	168.9	0	0	100	0	0	155.5	12173.5
22	Size	171219_95pc_1C 6	2017-12-21 14:24:21	168.9	0.104	170.3	0	0	100	0	0	159.2	11905
23	Size	171219_95pc_1C 7	2017-12-21 14:25:00	169.7	0.112	183.6	0	0	100	0	0	128.2	12050.4
24	Size	171219_95pc_1C 8	2017-12-21 14:25:39	172.8	0.108	167.9	0	0	100	0	0	159.9	11981.9

## Sheet: A1 80
Record	Type	Sample Name	Measurement Date and Time	Z-Ave	PdI	Pk 1 Mean Int	Pk 2 Mean Int	Pk 3 Mean Int	Pk 1 Area Int	Pk 2 Area Int	Peak 3 Area Intensity	Number Mean	Derived Count Rate
				d.nm		d.nm	d.nm	d.nm	%	%	%	d.nm	kcps
9	Size	171127_80pc_1C 1	2017-11-28 17:52:51	139.9	0.202	136.9	0	0	100	0	0	117.6	1618.5
10	Size	171127_80pc_1C 2	2017-11-28 17:53:30	139.1	0.192	140.9	0	0	100	0	0	116.9	1629.2
11	Size	171127_80pc_1C 3	2017-11-28 17:54:09	137.9	0.214	130.7	3841	0	89.9	10.1	0	114.2	1609.1
12	Size	171127_80pc_1C 4	2017-11-28 17:54:47	141.7	0.072	150.2	0	0	100	0	0	137.5	1643.7
13	Size	171127_80pc_1C 5	2017-11-28 17:55:26	143.2	0.169	141.8	0	0	100	0	0	127.8	1659.3
14	Size	171127_80pc_1C 6	2017-11-28 17:56:04	134.5	0.172	138.3	0	0	100	0	0	117.1	1609.4
15	Size	171127_80pc_1C 7	2017-11-28 17:56:43	138.3	0.182	143	0	0	100	0	0	121.7	1673.9
16	Size	171127_80pc_1C 8	2017-11-28 17:57:22	137.9	0.131	146.2	0	0	100	0	0	121.9	1601.4
17	Size	171127_80pc_1C 1	2017-11-28 18:03:16	138.3	0.202	150.6	0	0	100	0	0	90.4	1319.5
18	Size	171127_80pc_1C 2	2017-11-28 18:03:55	134.8	0.213	194	93.68	0	62.1	37.9	0	79.79	1334.1
19	Size	171127_80pc_1C 3	2017-11-28 18:04:33	136.5	0.189	142	0	0	100	0	0	127.6	1352.8
20	Size	171127_80pc_1C 4	2017-11-28 18:05:12	138.8	0.208	135.8	0	0	100	0	0	119.6	1356.3
21	Size	171127_80pc_1C 5	2017-11-28 18:05:51	139.9	0.216	132.9	0	0	100	0	0	123.4	1445.1
22	Size	171127_80pc_1C 6	2017-11-28 18:06:29	145.4	0.21	137.7	0	0	100	0	0	128.1	1490.6
23	Size	171127_80pc_1C 7	2017-11-28 18:07:08	138	0.163	138.8	0	0	100	0	0	131.3	1425
24	Size	171127_80pc_1C 8	2017-11-28 18:07:47	140.6	0.194	134.7	0	0	100	0	0	128.5	1457.2
25	Size	171127_80pc_1C 1	2017-11-28 18:16:12	165.4	0.157	160.1	0	0	100	0	0	147.4	1934.6
26	Size	171127_80pc_1C 2	2017-11-28 18:16:50	168.2	0.212	165.6	0	0	100	0	0	160.7	1926.5
27	Size	171127_80pc_1C 3	2017-11-28 18:17:29	171.8	0.228	138.4	0	0	100	0	0	136.9	1947.3
28	Size	171127_80pc_1C 4	2017-11-28 18:18:07	173.6	0.079	180.6	0	0	100	0	0	163.9	2027.1
29	Size	171127_80pc_1C 5	2017-11-28 18:18:46	169.8	0.103	169.2	0	0	100	0	0	155.4	1760.1
30	Size	171127_80pc_1C 6	2017-11-28 18:19:25	161.6	0.15	159.4	0	0	100	0	0	147.8	1555.7
31	Size	171127_80pc_1C 7	2017-11-28 18:20:04	178.2	0.027	183.4	0	0	100	0	0	174.5	2092.8
32	Size	171127_80pc_1C 8	2017-11-28 18:20:42	162.3	0.114	165.8	0	0	100	0	0	159.8	1811.2
1	Size	171215_80pc_1C 1	2017-12-17 13:40:27	190.6	0.101	189.2	0	0	100	0	0	185.4	2073.9
2	Size	171215_80pc_1C 2	2017-12-17 13:41:05	173.2	0.142	183.2	0	0	100	0	0	180.1	1971.9
3	Size	171215_80pc_1C 3	2017-12-17 13:41:44	177.7	0.051	178.2	0	0	100	0	0	175	1908.8
4	Size	171215_80pc_1C 4	2017-12-17 13:42:23	176.3	0.003	179.5	0	0	100	0	0	170.8	1937.4
5	Size	171215_80pc_1C 5	2017-12-17 13:43:01	174.8	0.072	186.2	0	0	100	0	0	175	1831.6
6	Size	171215_80pc_1C 6	2017-12-17 13:43:40	175.3	0.105	178.5	0	0	100	0	0	168.9	1864.2
7	Size	171215_80pc_1C 7	2017-12-17 13:44:19	173.8	0.059	182.5	0	0	100	0	0	165.3	1942.3
8	Size	171215_80pc_1C 8	2017-12-17 13:44:58	175.7	0.201	172.1	0	0	100	0	0	166.6	2061.1
9	Size	171215_80pc_1C 1	2017-12-17 13:46:36	174.3	0.092	179.3	0	0	100	0	0	170.5	2174.2
10	Size	171215_80pc_1C 2	2017-12-17 13:47:15	176.9	0.078	187.6	0	0	100	0	0	154.5	2184.3
11	Size	171215_80pc_1C 3	2017-12-17 13:47:54	178.3	0.15	178.8	0	0	100	0	0	154.1	2266.4
12	Size	171215_80pc_1C 4	2017-12-17 13:48:32	171.8	0.1	193.8	0	0	100	0	0	137.4	2118.6
13	Size	171215_80pc_1C 5	2017-12-17 13:49:11	173.3	0.008	176.4	0	0	100	0	0	169.4	2187.8
14	Size	171215_80pc_1C 6	2017-12-17 13:49:49	172.3	0.049	176.9	0	0	100	0	0	171.3	2322.8
15	Size	171215_80pc_1C 7	2017-12-17 13:50:28	178.5	0.087	195.7	0	0	100	0	0	169.1	2245.6
16	Size	171215_80pc_1C 8	2017-12-17 13:51:07	184.6	0.087	189.2	0	0	100	0	0	176.4	2342
7	Size	171218_80pc_1C 7	2017-12-20 11:40:10	172.7	0.359	126.8	298.3	0	59.1	40.9	0	102.2	1095.6
8	Size	171218_80pc_1C 8	2017-12-20 11:40:48	144.7	0.201	148	0	0	100	0	0	121.6	956.1
9	Size	171218_80pc_1C 1	2017-12-20 11:53:40	195.2	0.003	200.4	0	0	100	0	0	192.5	1614.5
10	Size	171218_80pc_1C 2	2017-12-20 11:54:19	211.7	0.017	214.6	0	0	100	0	0	209.2	1790.2
11	Size	171218_80pc_1C 3	2017-12-20 11:54:57	209.1	0.152	219.5	0	0	100	0	0	195.2	1818
12	Size	171218_80pc_1C 4	2017-12-20 11:55:36	195.8	0.285	166.1	0	0	100	0	0	161.7	1819.5
13	Size	171218_80pc_1C 5	2017-12-20 11:56:15	214.9	0.172	209.5	0	0	100	0	0	199.1	1959.9
14	Size	171218_80pc_1C 6	2017-12-20 11:56:54	205.8	0.236	192.4	0	0	100	0	0	179	1912
15	Size	171218_80pc_1C 7	2017-12-20 11:57:32	200.1	0.25	194.4	0	0	100	0	0	192.8	2068.5
16	Size	171218_80pc_1C 8	2017-12-20 11:58:11	216.8	0.096	225.5	0	0	100	0	0	200.3	2018.5

## Sheet: A1 75
Record	Type	Sample Name	Measurement Date and Time	Z-Ave	PdI	Pk 1 Mean Int	Pk 2 Mean Int	Pk 3 Mean Int	Pk 1 Area Int	Pk 2 Area Int	Peak 3 Area Intensity	Number Mean	Derived Count Rate
				d.nm		d.nm	d.nm	d.nm	%	%	%	d.nm	kcps
17	Size	171127_75pc_1C 1	2017-11-28 19:39:46	181.8	0.189	173.5	0	0	100	0	0	168.7	1653.1
18	Size	171127_75pc_1C 2	2017-11-28 19:40:24	183.5	0.101	194.9	0	0	100	0	0	185	1702.8
19	Size	171127_75pc_1C 3	2017-11-28 19:41:03	191.5	0.159	196	0	0	100	0	0	185.3	1725.9
20	Size	171127_75pc_1C 4	2017-11-28 19:41:42	191.7	0.122	196.9	0	0	100	0	0	189.6	1707.8
21	Size	171127_75pc_1C 5	2017-11-28 19:42:21	199.2	0.165	199.5	0	0	100	0	0	188.1	1728.6
22	Size	171127_75pc_1C 6	2017-11-28 19:43:00	196.3	0.104	205.4	0	0	100	0	0	187.1	1690.3
23	Size	171127_75pc_1C 7	2017-11-28 19:43:39	203.2	0.086	212.9	0	0	100	0	0	204.9	1818.5
24	Size	171127_75pc_1C 8	2017-11-28 19:44:17	193.8	0.191	190.4	0	0	100	0	0	182.8	1815
25	Size	171127_75pc_1C 1	2017-11-28 19:58:47	201	0.062	211.3	0	0	100	0	0	206.9	1299.1
26	Size	171127_75pc_1C 2	2017-11-28 19:59:25	214	0.256	197.6	0	0	100	0	0	193.5	1271.3
27	Size	171127_75pc_1C 3	2017-11-28 20:00:04	204.7	0.07	216.6	0	0	100	0	0	211.3	1278.5
28	Size	171127_75pc_1C 4	2017-11-28 20:00:43	204.9	0.11	218.7	0	0	100	0	0	208.4	1279.8
29	Size	171127_75pc_1C 5	2017-11-28 20:01:21	208.6	0.11	224.2	0	0	100	0	0	211.4	1334.3
30	Size	171127_75pc_1C 6	2017-11-28 20:02:00	200.7	0.219	205	0	0	100	0	0	196.9	1296.3
31	Size	171127_75pc_1C 7	2017-11-28 20:02:39	205.4	0.032	213.8	0	0	100	0	0	209.1	1326.1
32	Size	171127_75pc_1C 8	2017-11-28 20:03:17	215.6	0.063	226.6	0	0	100	0	0	220.5	1309.5
17	Size	171215_75pc_1C 1	2017-12-16 17:12:51	231.5	0.009	238.1	0	0	100	0	0	235.6	1090
18	Size	171215_75pc_1C 2	2017-12-16 17:13:30	211.4	0.19	211.9	0	0	100	0	0	198.9	1048.5
19	Size	171215_75pc_1C 3	2017-12-16 17:14:09	238.8	0.154	253	0	0	100	0	0	227.7	1125
20	Size	171215_75pc_1C 4	2017-12-16 17:14:47	237.6	0.13	258.4	0	0	100	0	0	241.2	1104.8
21	Size	171215_75pc_1C 5	2017-12-16 17:15:26	221.5	0.155	255	0	0	100	0	0	185.2	1042
22	Size	171215_75pc_1C 6	2017-12-16 17:16:04	223.9	0.152	246	0	0	100	0	0	223.6	987
23	Size	171215_75pc_1C 7	2017-12-16 17:16:43	228.6	0.179	254.5	0	0	100	0	0	231.1	1058.4
24	Size	171215_75pc_1C 8	2017-12-16 17:17:22	252.3	0.187	281.7	0	0	100	0	0	251.8	1073.2
3	Size	171218_75pc_1C 1	2017-12-20 16:50:56	197	0.137	209.5	0	0	100	0	0	207.3	1746.6
4	Size	171218_75pc_1C 2	2017-12-20 16:51:35	194.4	0.165	208.2	0	0	100	0	0	205.2	1731.2
5	Size	171218_75pc_1C 3	2017-12-20 16:52:14	219.5	0.067	221.3	0	0	100	0	0	215.8	1764.6
6	Size	171218_75pc_1C 4	2017-12-20 16:52:53	211.3	0.021	217.2	0	0	100	0	0	211.4	1708.6
7	Size	171218_75pc_1C 5	2017-12-20 16:53:31	215.2	0.194	205	0	0	100	0	0	201.2	1778.1
8	Size	171218_75pc_1C 6	2017-12-20 16:54:10	210	0.149	220.3	0	0	100	0	0	205.6	1768.6
9	Size	171218_75pc_1C 7	2017-12-20 16:54:49	209.9	0.077	221	0	0	100	0	0	200.5	1729.8
10	Size	171218_75pc_1C 8	2017-12-20 16:55:28	235.6	0.134	229	0	0	100	0	0	212.8	1728.5
11	Size	171218_75pc_1C 1	2017-12-20 16:56:44	205.9	0.147	214.3	0	0	100	0	0	208.7	1886.9
12	Size	171218_75pc_1C 2	2017-12-20 16:57:23	207.7	0.005	211.1	0	0	100	0	0	206.7	1806
13	Size	171218_75pc_1C 3	2017-12-20 16:58:02	215	0.105	214.8	0	0	100	0	0	210.1	1821.9
14	Size	171218_75pc_1C 4	2017-12-20 16:58:41	215.2	0.033	218.2	0	0	100	0	0	213.3	1832.6
15	Size	171218_75pc_1C 5	2017-12-20 16:59:20	214.9	0.002	219.4	0	0	100	0	0	213.1	1848.5
16	Size	171218_75pc_1C 6	2017-12-20 16:59:59	209.5	0.026	215.5	0	0	100	0	0	207	1782.5
17	Size	171218_75pc_1C 7	2017-12-20 17:00:37	212.9	0.124	217.4	0	0	100	0	0	204.5	1881.9
18	Size	171218_75pc_1C 8	2017-12-20 17:01:16	216.5	0.054	224.8	0	0	100	0	0	218.5	1842.2

## Sheet: A1 70
Record	Type	Sample Name	Measurement Date and Time	Z-Ave	PdI	Pk 1 Mean Int	Pk 2 Mean Int	Pk 3 Mean Int	Pk 1 Area Int	Pk 2 Area Int	Peak 3 Area Intensity	Number Mean	Derived Count Rate
				d.nm		d.nm	d.nm	d.nm	%	%	%	d.nm	kcps
3	Size	171221_70pc_1C 1	2017-12-24 10:05:45	237.2	0.07	238.1	0	0	100	0	0	235.6	2821.7
4	Size	171221_70pc_1C 2	2017-12-24 10:06:24	241	0.252	234	0	0	100	0	0	231.8	2800.7
5	Size	171221_70pc_1C 3	2017-12-24 10:07:02	225.2	0.121	236.7	0	0	100	0	0	234.3	2795.7
6	Size	171221_70pc_1C 4	2017-12-24 10:07:41	240.7	0.035	243.1	0	0	100	0	0	238.9	2786.6
7	Size	171221_70pc_1C 5	2017-12-24 10:08:20	243.8	0.022	248.1	0	0	100	0	0	243.3	2774.8
8	Size	171221_70pc_1C 6	2017-12-24 10:08:59	229.8	0.08	240	0	0	100	0	0	225.7	2664.9
9	Size	171221_70pc_1C 7	2017-12-24 10:09:37	245.4	0.148	244.1	0	0	100	0	0	228.7	2677.6
10	Size	171221_70pc_1C 8	2017-12-24 10:10:16	241.3	0.133	253.8	0	0	100	0	0	226.9	2636.2
11	Size	171221_70pc_1C 1	2017-12-24 10:11:41	241.3	0.081	253.6	0	0	100	0	0	236.1	2632
12	Size	171221_70pc_1C 2	2017-12-24 10:12:20	250.2	0.051	260.9	0	0	100	0	0	246.9	2630.9
13	Size	171221_70pc_1C 3	2017-12-24 10:12:58	233.8	0.171	243.3	0	0	100	0	0	220.4	2599.6
14	Size	171221_70pc_1C 4	2017-12-24 10:13:37	245.5	0.168	349.3	175.1	0	65	35	0	186.2	2638.3
15	Size	171221_70pc_1C 5	2017-12-24 10:14:15	242.4	0.156	248.6	0	0	100	0	0	239.7	2607.6
16	Size	171221_70pc_1C 6	2017-12-24 10:14:54	239.1	0.174	229.9	0	0	100	0	0	218	2645
17	Size	171221_70pc_1C 7	2017-12-24 10:15:33	249.4	0.083	259.4	0	0	100	0	0	245.5	2602.5
18	Size	171221_70pc_1C 8	2017-12-24 10:16:11	251.7	0.188	228.8	583	0	71.3	28.7	0	203.7	2606.1
19	Size	171221_70pc_1C 1	2017-12-24 10:41:44	275.6	0.008	283	0	0	100	0	0	278.6	1603.5
20	Size	171221_70pc_1C 2	2017-12-24 10:42:23	274.8	0.101	276.6	0	0	100	0	0	273.9	1612.4
21	Size	171221_70pc_1C 3	2017-12-24 10:43:01	283.6	0.115	275.5	0	0	100	0	0	272.7	1620
22	Size	171221_70pc_1C 4	2017-12-24 10:43:40	275.1	0.061	287.1	0	0	100	0	0	281.5	1644.3
23	Size	171221_70pc_1C 5	2017-12-24 10:44:19	265.2	0.126	283.7	0	0	100	0	0	265	1551.7
24	Size	171221_70pc_1C 6	2017-12-24 10:44:57	273.8	0.152	298	0	0	100	0	0	271.8	1620.7
25	Size	171221_70pc_1C 7	2017-12-24 10:45:36	269	0.12	281.4	0	0	100	0	0	269.6	1494.6
26	Size	171221_70pc_1C 8	2017-12-24 10:46:15	280.4	0.059	293.9	0	0	100	0	0	286.3	1520.7
27	Size	171221_70pc_1C 1	2017-12-24 11:01:13	265.8	0.156	308.5	0	0	100	0	0	267.3	1474.8
28	Size	171221_70pc_1C 2	2017-12-24 11:01:51	259.7	0.189	268.9	0	0	100	0	0	258	1462.1
29	Size	171221_70pc_1C 3	2017-12-24 11:02:30	262.6	0.01	270.9	0	0	100	0	0	266.5	1463.7
30	Size	171221_70pc_1C 4	2017-12-24 11:03:09	265.5	0.166	321.4	135.6	0	90.3	9.7	0	192.7	1418.8
31	Size	171221_70pc_1C 5	2017-12-24 11:03:47	280.8	0.195	277.7	0	0	100	0	0	267.6	1438.8
32	Size	171221_70pc_1C 6	2017-12-24 11:04:26	269.2	0.201	272.4	0	0	100	0	0	259.5	1430.5
33	Size	171221_70pc_1C 7	2017-12-24 11:05:05	279.8	0.201	272.6	0	0	100	0	0	258.5	1474.9
34	Size	171221_70pc_1C 8	2017-12-24 11:05:43	283.2	0.133	310.1	0	0	100	0	0	293	1503.2
3	Size	171227_70pc_1C 1	2018-01-03 09:07:29	271.5	0.205	271.4	0	0	100	0	0	267.7	1691.3
4	Size	171227_70pc_1C 2	2018-01-03 09:08:08	296.1	0.152	315.6	0	0	100	0	0	312.4	1717.3
5	Size	171227_70pc_1C 3	2018-01-03 09:08:46	311.4	0.12	330.9	0	0	100	0	0	322.5	1707.6
6	Size	171227_70pc_1C 4	2018-01-03 09:09:25	318.7	0.108	332.6	0	0	100	0	0	321.1	1735.5
7	Size	171227_70pc_1C 5	2018-01-03 09:10:03	341.9	0.192	413.6	100	0	94.5	5.5	0	140.4	1709.9
8	Size	171227_70pc_1C 6	2018-01-03 09:10:42	334.8	0.247	312.9	0	0	100	0	0	300.4	1752.4
9	Size	171227_70pc_1C 7	2018-01-03 09:11:21	344.1	0.216	436.1	102.9	0	93.6	6.4	0	138	1668.1
10	Size	171227_70pc_1C 8	2018-01-03 09:12:00	358.3	0.261	329.1	2448	0	81.8	18.2	0	302.8	1750.3
11	Size	171227_70pc_1C 1	2018-01-03 09:36:27	341.5	0.208	318.5	0	0	100	0	0	316	1442.9
12	Size	171227_70pc_1C 2	2018-01-03 09:37:06	386.5	0.263	366.7	0	0	100	0	0	364.3	1426
13	Size	171227_70pc_1C 3	2018-01-03 09:37:45	423.2	0.172	456.7	0	0	100	0	0	451.8	1491.5
14	Size	171227_70pc_1C 4	2018-01-03 09:38:23	475.2	0.127	479.8	0	0	100	0	0	477	1452.4
15	Size	171227_70pc_1C 5	2018-01-03 09:39:02	491	0.229	502.8	0	0	100	0	0	450.4	1475.7
16	Size	171227_70pc_1C 6	2018-01-03 09:39:41	502.9	0.103	550.1	0	0	100	0	0	542.3	1458
17	Size	171227_70pc_1C 7	2018-01-03 09:40:19	509.1	0.23	483.4	1556	0	78.8	21.2	0	439.7	1467.8
18	Size	171227_70pc_1C 8	2018-01-03 09:40:33	528.1	0.277	431.1	2160	0	71.9	28.1	0	416.4	1503.2
19	Size	171227_70pc_1C 1	2018-01-03 09:51:30	210.5	0.159	229	0	0	100	0	0	225.8	1468.7
20	Size	171227_70pc_1C 2	2018-01-03 09:52:09	239.1	0.068	255.6	0	0	100	0	0	249.2	1413.6
21	Size	171227_70pc_1C 3	2018-01-03 09:52:48	244.2	0.039	259.1	0	0	100	0	0	254.1	1394.2
22	Size	171227_70pc_1C 4	2018-01-03 09:53:26	265.2	0.147	293.3	0	0	100	0	0	277.8	1379.4
23	Size	171227_70pc_1C 5	2018-01-03 09:54:05	264.8	0.214	271.4	0	0	100	0	0	259.7	1324.6
24	Size	171227_70pc_1C 6	2018-01-03 09:54:44	282.8	0.246	299.6	5204	0	97.8	2.2	0	244.1	1350
25	Size	171227_70pc_1C 7	2018-01-03 09:55:22	271.4	0.241	272.9	0	0	100	0	0	260.3	1334.1
26	Size	171227_70pc_1C 8	2018-01-03 09:56:01	269.7	0.274	261.5	0.9252	0	94.8	5.2	0	0.9025	1281.5
27	Size	171227_70pc_1C 1	2018-01-03 10:06:22	202.2	0.108	202.3	0	0	100	0	0	200.3	2682.7
28	Size	171227_70pc_1C 2	2018-01-03 10:07:01	228.2	0.016	234.4	0	0	100	0	0	232	2504.2
29	Size	171227_70pc_1C 3	2018-01-03 10:07:40	235.1	0.056	244.9	0	0	100	0	0	240.7	2294.3
30	Size	171227_70pc_1C 4	2018-01-03 10:08:18	263	0.028	268.1	0	0	100	0	0	263.9	2197.9
31	Size	171227_70pc_1C 5	2018-01-03 10:08:57	274.1	0.124	302.1	0	0	100	0	0	270.2	2069.1
32	Size	171227_70pc_1C 6	2018-01-03 10:09:36	268.6	0.104	284.4	0	0	100	0	0	276.4	1940.3
33	Size	171227_70pc_1C 7	2018-01-03 10:10:14	288.4	0.092	306.7	0	0	100	0	0	291.6	1893.8
34	Size	171227_70pc_1C 8	2018-01-03 10:10:53	294.7	0.147	311.3	0	0	100	0	0	298.9	1874.8
35	Size	171227_70pc_1C 1	2018-01-03 10:12:05	312.6	0.209	322.7	0	0	100	0	0	301.7	1769.9
36	Size	171227_70pc_1C 2	2018-01-03 10:12:43	307.8	0.208	307.1	0	0	100	0	0	295.8	1758.6
37	Size	171227_70pc_1C 3	2018-01-03 10:13:22	313.3	0.189	328.6	0	0	100	0	0	315.9	1732.1
38	Size	171227_70pc_1C 4	2018-01-03 10:14:01	343.7	0.176	355.7	0	0	100	0	0	329.4	1765.6
39	Size	171227_70pc_1C 5	2018-01-03 10:14:39	349.8	0.149	372.6	0	0	100	0	0	344.3	1625.1
40	Size	171227_70pc_1C 6	2018-01-03 10:15:18	360.8	0.222	352.3	0	0	100	0	0	333.5	1665.3
41	Size	171227_70pc_1C 7	2018-01-03 10:15:56	365.9	0.271	349.4	5321	0	97	3	0	311.3	1697.2
42	Size	171227_70pc_1C 8	2018-01-03 10:16:35	368.4	0.265	310.4	977.8	0	66	34	0	284.3	1653.6
1	Size	180207_70pc_1C 1	2018-02-09 06:35:23	249.8	0.187	289.5	0	0	100	0	0	243.1	1257.4
2	Size	180207_70pc_1C 2	2018-02-09 06:36:02	246.5	0.265	257.1	0	0	100	0	0	226.4	1264.6
3	Size	180207_70pc_1C 3	2018-02-09 06:36:41	246.5	0.207	283.4	0	0	100	0	0	247.9	1297.9
4	Size	180207_70pc_1C 4	2018-02-09 06:37:19	253.3	0.21	295.7	0	0	100	0	0	246.1	1251.2
5	Size	180207_70pc_1C 5	2018-02-09 06:37:58	266.2	0.21	321.5	0	0	100	0	0	246.4	1237.5
6	Size	180207_70pc_1C 6	2018-02-09 06:38:36	246.5	0.213	286.2	0	0	100	0	0	228.8	1235.1
7	Size	180207_70pc_1C 7	2018-02-09 06:39:15	254	0.192	292.7	0	0	100	0	0	253	1237.5
8	Size	180207_70pc_1C 8	2018-02-09 06:39:53	271.8	0.207	315.9	0	0	100	0	0	269.8	1247
9	Size	180207_70pc_1C 9	2018-02-09 06:40:32	268.7	0.191	306.6	0	0	100	0	0	273.6	1312.5
10	Size	180207_70pc_1C 10	2018-02-09 06:41:11	284.6	0.16	321.8	0	0	100	0	0	285.7	1326.2
11	Size	180207_70pc_1C 11	2018-02-09 06:41:49	271.5	0.221	311.3	0	0	100	0	0	258.2	1264.4
12	Size	180207_70pc_1C 12	2018-02-09 06:42:28	274.7	0.205	303.6	0	0	100	0	0	257.4	1237.2
13	Size	180207_70pc_1C 13	2018-02-09 06:43:07	272	0.27	303.8	0.8771	4783	91.6	5	3.4	0.8155	1219.9
14	Size	180207_70pc_1C 14	2018-02-09 06:43:45	281.6	0.097	310.6	0	0	100	0	0	286	1243.1
15	Size	180207_70pc_1C 1	2018-02-09 07:01:06	306.1	0.14	345.9	0.8423	0	94.2	5.8	0	0.7255	1024.1
16	Size	180207_70pc_1C 2	2018-02-09 07:01:44	332.7	0.433	264.4	0.757	0	92.6	7.4	0	0.7197	1035.2
17	Size	180207_70pc_1C 3	2018-02-09 07:02:23	302.2	0.165	338.2	0.7385	0	94.8	5.2	0	0.6952	1066
18	Size	180207_70pc_1C 4	2018-02-09 07:03:01	311.1	0.081	343.6	0.7601	0	94.2	5.8	0	0.6973	1013
19	Size	180207_70pc_1C 5	2018-02-09 07:03:40	316.9	0.039	344.2	0.7007	0	94.5	5.5	0	0.667	1090.4
20	Size	180207_70pc_1C 6	2018-02-09 07:04:19	301.8	0.206	346.5	0.8319	0	94.4	5.6	0	0.7853	985.4
21	Size	180207_70pc_1C 7	2018-02-09 07:04:57	318.5	0.232	338.3	0.8167	0	94.4	5.6	0	0.7692	1062
22	Size	180207_70pc_1C 8	2018-02-09 07:05:36	325.2	0.087	360.9	0.8169	0	94.2	5.8	0	0.7437	986
23	Size	180207_70pc_1C 9	2018-02-09 07:06:14	316.2	0.174	357.7	0.7938	0	94.6	5.4	0	0.7209	1025
24	Size	180207_70pc_1C 10	2018-02-09 07:06:53	310.9	0.188	354.4	0.8419	0	94.6	5.4	0	0.7914	1047.2
25	Size	180207_70pc_1C 11	2018-02-09 07:07:32	338.2	0.27	351.2	0.8565	0	93.5	6.5	0	0.7946	967.1
26	Size	180207_70pc_1C 12	2018-02-09 07:08:11	307.1	0.211	353	0.8233	0	94.5	5.5	0	0.7572	974.7
27	Size	180207_70pc_1C 13	2018-02-09 07:08:49	355	0.286	337.6	0.7921	0	93.6	6.4	0	0.7382	978
28	Size	180207_70pc_1C 14	2018-02-09 07:09:28	342.5	0.112	371.4	0	0	100	0	0	344.9	1023.9
29	Size	180207_70pc_1C 1	2018-02-09 07:21:48	254.2	0.211	287.2	0	0	100	0	0	235.2	1153.2
30	Size	180207_70pc_1C 2	2018-02-09 07:22:26	250.6	0.218	285.5	0	0	100	0	0	241.7	1127.9
31	Size	180207_70pc_1C 3	2018-02-09 07:23:05	263.8	0.21	282.7	0.8348	0	94.7	5.3	0	0.7446	1133.3
32	Size	180207_70pc_1C 4	2018-02-09 07:23:44	264.7	0.246	286.7	0	0	100	0	0	244.2	1128.3
33	Size	180207_70pc_1C 5	2018-02-09 07:24:23	255.2	0.245	287.8	5246	0	98.9	1.1	0	231	1091.4
34	Size	180207_70pc_1C 6	2018-02-09 07:25:02	287.7	0.355	235.5	0.7123	0	94.1	5.9	0	0.675	1164
35	Size	180207_70pc_1C 7	2018-02-09 07:25:41	282.8	0.451	211.2	0.6919	0	93.5	6.5	0	0.6626	1164.6
36	Size	180207_70pc_1C 8	2018-02-09 07:26:20	267.5	0.275	261.8	0.8226	0	94.8	5.2	0	0.7788	1139
37	Size	180207_70pc_1C 9	2018-02-09 07:26:58	271.9	0.255	277	0.7878	0	95	5	0	0.7222	1129.4
38	Size	180207_70pc_1C 10	2018-02-09 07:27:37	269.2	0.242	297.6	0.7713	0	94.6	5.4	0	0.7145	1106.3
39	Size	180207_70pc_1C 11	2018-02-09 07:28:16	277	0.225	285.3	0.8395	0	94.8	5.2	0	0.7912	1127.4
40	Size	180207_70pc_1C 12	2018-02-09 07:28:55	286.4	0.374	239.8	0.7817	0	94.5	5.5	0	0.7596	1128.1
41	Size	180207_70pc_1C 13	2018-02-09 07:29:34	274.1	0.138	299.7	0	0	100	0	0	273.6	1136.2
42	Size	180207_70pc_1C 14	2018-02-09 07:30:13	281.7	0.364	245.2	0.7936	0	94.1	5.9	0	0.7369	1083.2
43	Size	180207_70pc_1C 1	2018-02-09 07:35:39	302.7	0.414	224.6	0.6935	0	93.7	6.3	0	0.6639	1085.5
44	Size	180207_70pc_1C 2	2018-02-09 07:36:18	284.1	0.173	320.3	0	0	100	0	0	294	1088
45	Size	180207_70pc_1C 3	2018-02-09 07:36:57	299.2	0.441	226.7	0.7232	0	94	6	0	0.6854	1091.4
46	Size	180207_70pc_1C 4	2018-02-09 07:37:35	285.5	0.167	324.4	0	0	100	0	0	283.6	1066.7
47	Size	180207_70pc_1C 5	2018-02-09 07:38:14	301.7	0.258	289.1	0.746	0	94.4	5.6	0	0.7003	1059.8
48	Size	180207_70pc_1C 6	2018-02-09 07:38:53	289.8	0.183	317.2	0	0	100	0	0	289.1	1047
49	Size	180207_70pc_1C 7	2018-02-09 07:39:32	287.5	0.215	320.1	0	0	100	0	0	279.9	1028.2
50	Size	180207_70pc_1C 8	2018-02-09 07:40:11	307.2	0.037	327.2	0	0	100	0	0	305.5	1062.2
51	Size	180207_70pc_1C 9	2018-02-09 07:40:49	294.5	0.048	321	0	0	100	0	0	296.9	1017.9
52	Size	180207_70pc_1C 10	2018-02-09 07:41:28	292.7	0.176	308.2	0.704	0	94.7	5.3	0	0.6679	1042.8
53	Size	180207_70pc_1C 11	2018-02-09 07:42:07	286.9	0.144	319.3	0	0	100	0	0	293.1	1058.6
54	Size	180207_70pc_1C 12	2018-02-09 07:42:45	284.6	0.092	312.1	0	0	100	0	0	288.1	1048.4
55	Size	180207_70pc_1C 13	2018-02-09 07:43:24	283.1	0.213	281.2	0	0	100	0	0	257.7	1001.9
56	Size	180207_70pc_1C 14	2018-02-09 07:44:03	330.4	0.491	217.9	0.6575	0	94.2	5.8	0	0.6439	1035.1

## Sheet: A1 65
Record	Type	Sample Name	Measurement Date and Time	Z-Ave	PdI	Pk 1 Mean Int	Pk 2 Mean Int	Pk 3 Mean Int	Pk 1 Area Int	Pk 2 Area Int	Peak 3 Area Intensity	Number Mean	Derived Count Rate
				d.nm		d.nm	d.nm	d.nm	%	%	%	d.nm	kcps
1	Size	171221_65pc_1C 1	2017-12-24 11:52:11	284.4	0.103	309	0	0	100	0	0	303.4	1241.6
2	Size	171221_65pc_1C 2	2017-12-24 11:52:50	298.6	0.087	321.9	0	0	100	0	0	319	1361.9
3	Size	171221_65pc_1C 3	2017-12-24 11:53:29	280.8	0.186	321	0	0	100	0	0	301.6	1260.4
4	Size	171221_65pc_1C 4	2017-12-24 11:54:08	262.3	0.132	288.8	0.9417	0	94.8	5.2	0	0.925	1217.8
5	Size	171221_65pc_1C 5	2017-12-24 11:54:46	280.7	0.239	300.3	0	0	100	0	0	281.4	1200.1
6	Size	171221_65pc_1C 6	2017-12-24 11:55:25	259.3	0.243	270.3	0.9565	0	94.7	5.3	0	0.9513	1167.9
7	Size	171221_65pc_1C 7	2017-12-24 11:56:04	281.7	0.193	322.1	0.9564	0	94.9	5.1	0	0.9511	1199.9
8	Size	171221_65pc_1C 8	2017-12-24 11:56:43	273.6	0.194	303.2	0.8994	0	94.7	5.3	0	0.8768	1158.8
9	Size	171221_65pc_1C 1	2017-12-24 12:07:23	406.3	0.134	449.4	0	0	100	0	0	442.1	1076.5
10	Size	171221_65pc_1C 2	2017-12-24 12:08:02	391.5	0.258	426.4	0.9399	0	93.3	6.7	0	0.9097	1023.3
11	Size	171221_65pc_1C 3	2017-12-24 12:08:41	404.1	0.265	423	1.014	0	93.4	6.6	0	0.9951	1041.8
12	Size	171221_65pc_1C 4	2017-12-24 12:09:19	382.6	0.233	472.9	0.942	0	93.1	6.9	0	0.9255	996.1
13	Size	171221_65pc_1C 5	2017-12-24 12:09:58	396.3	0.3	638.7	206.9	0.8612	72.6	20.4	6.9	0.8464	976.8
14	Size	171221_65pc_1C 6	2017-12-24 12:10:37	410.3	0.346	795.3	252.1	0.9745	60.9	32.7	6.4	0.9743	991.7
15	Size	171221_65pc_1C 7	2017-12-24 12:11:16	394.7	0.269	546	159.6	0.9121	83.5	9.8	6.7	0.8883	996.7
16	Size	171221_65pc_1C 8	2017-12-24 12:11:54	419.8	0.256	423.5	0.9759	0	93.3	6.7	0	0.9469	1033.1
17	Size	171221_65pc_1C 1	2017-12-24 15:38:13	271.8	0.082	292.6	0	0	100	0	0	286.2	1341.3
18	Size	171221_65pc_1C 2	2017-12-24 15:38:52	281.7	0.027	295.9	0	0	100	0	0	290.8	1295.4
19	Size	171221_65pc_1C 3	2017-12-24 15:39:31	283.5	0.193	308.9	0	0	100	0	0	294.7	1339.4
20	Size	171221_65pc_1C 4	2017-12-24 15:40:10	268	0.165	295.8	0	0	100	0	0	288.4	1259
21	Size	171221_65pc_1C 5	2017-12-24 15:40:48	268	0.249	267.8	0	0	100	0	0	253.5	1213.4
22	Size	171221_65pc_1C 6	2017-12-24 15:41:27	278.8	0.261	281	0.9282	5472	93.9	5	1	0.8992	1216.4
23	Size	171221_65pc_1C 7	2017-12-24 15:42:06	287.2	0.325	276.8	0	0	100	0	0	264.4	1236.6
24	Size	171221_65pc_1C 8	2017-12-24 15:42:44	315.8	0.273	559	236.4	0	58.1	41.9	0	249.7	1206.5
25	Size	171221_65pc_1C 1	2017-12-26 12:38:18	254.6	0.132	276.8	0	0	100	0	0	273.7	1495.4
26	Size	171221_65pc_1C 2	2017-12-26 12:38:57	276.1	0.182	306.7	0	0	100	0	0	295.8	1457.6
27	Size	171221_65pc_1C 3	2017-12-26 12:39:36	258	0.02	272.6	0	0	100	0	0	270	1416.6
28	Size	171221_65pc_1C 4	2017-12-26 12:40:15	252.7	0.177	281.7	0	0	100	0	0	277.9	1368.6
29	Size	171221_65pc_1C 5	2017-12-26 12:40:53	259.7	0.097	282.8	0.9053	0	95	5	0	0.8819	1326.7
30	Size	171221_65pc_1C 6	2017-12-26 12:41:31	238.8	0.209	264.9	0	0	100	0	0	254.6	1285.3
31	Size	171221_65pc_1C 7	2017-12-26 12:42:10	253.5	0.236	277.2	0.988	0	94.5	5.5	0	0.9503	1261.4
32	Size	171221_65pc_1C 8	2017-12-26 12:42:49	256.7	0.245	272.7	0	0	100	0	0	256	1219
1	Size	171223_65pc_1C 1	2017-12-28 11:40:39	292.2	0.253	467.2	231.7	0	60.1	39.9	0	251.8	1289.1
2	Size	171223_65pc_1C 2	2017-12-28 11:41:17	280.7	0.209	315.6	0.8789	0	94.5	5.5	0	0.8616	1278.9
3	Size	171223_65pc_1C 3	2017-12-28 11:41:56	240.2	0.144	265.8	0.658	0	94.7	5.3	0	0.6442	1304.5
4	Size	171223_65pc_1C 4	2017-12-28 11:42:35	260.3	0.08	284.6	0.7165	0	94.8	5.2	0	0.7164	1288.9
5	Size	171223_65pc_1C 5	2017-12-28 11:43:13	286	0.2	321.9	1.018	0	94.6	5.4	0	0.936	1245.3
6	Size	171223_65pc_1C 6	2017-12-28 11:43:52	296.7	0.073	321.7	0.8428	0	94.3	5.7	0	0.8419	1245.7
7	Size	171223_65pc_1C 7	2017-12-28 11:44:30	270.4	0.01	289	0.8176	0	94.4	5.6	0	0.806	1207.5
8	Size	171223_65pc_1C 8	2017-12-28 11:45:09	301.3	0.038	324.1	0.9621	0	94.8	5.2	0	0.9635	1219.3
9	Size	171223_65pc_1C 1	2017-12-28 11:54:44	374.1	0.181	423.2	1.03	0	94	6	0	1.006	1086.5
10	Size	171223_65pc_1C 2	2017-12-28 11:55:22	396.7	0.227	452.2	0.9225	0	94.1	5.9	0	0.8994	1186
11	Size	171223_65pc_1C 3	2017-12-28 11:56:00	386.5	0.194	436.4	0.8757	0	94.1	5.9	0	0.8596	1143.4
12	Size	171223_65pc_1C 4	2017-12-28 11:56:39	396.2	0.093	432.3	0.8365	0	94	6	0	0.8391	1137.3
13	Size	171223_65pc_1C 5	2017-12-28 11:57:17	377.3	0.172	421.2	0.9271	0	94.2	5.8	0	0.9048	1138.6
14	Size	171223_65pc_1C 6	2017-12-28 11:57:55	423.8	1	384.4	0.697	0	94.1	5.9	0	0.6822	1155.9
15	Size	171223_65pc_1C 7	2017-12-28 11:58:34	438.5	0.74	418.5	0.7195	0	94.3	5.7	0	0.7234	1201.2
16	Size	171223_65pc_1C 8	2017-12-28 11:59:13	393.5	0.113	432.6	0.9967	0	94.1	5.9	0	0.9852	1107.5
1	Size	171227_65pc_1C 1	2018-01-03 11:03:53	208.9	0.077	227.3	0.7802	0	94.5	5.5	0	0.7601	1328.6
2	Size	171227_65pc_1C 2	2018-01-03 11:04:31	229.7	0.15	254.8	0.9313	0	95	5	0	0.9103	1329.1
3	Size	171227_65pc_1C 3	2018-01-03 11:05:10	247.2	0.117	272.1	0	0	100	0	0	266.8	1310.9
4	Size	171227_65pc_1C 4	2018-01-03 11:05:49	252.4	0.205	294.6	0.9472	0	94.5	5.5	0	0.8972	1321.2
5	Size	171227_65pc_1C 5	2018-01-03 11:06:27	255	0.215	296.1	1.037	0	94.9	5.1	0	1.011	1310.2
6	Size	171227_65pc_1C 6	2018-01-03 11:07:06	251.1	0.172	282.9	1.047	0	95	5	0	1.02	1288.9
7	Size	171227_65pc_1C 7	2018-01-03 11:07:45	264	0.227	308.3	0.9776	0	94.5	5.5	0	0.9757	1299.6
8	Size	171227_65pc_1C 8	2018-01-03 11:08:23	257.7	0.262	274.2	0.9855	0	94.6	5.4	0	0.9717	1280.3
9	Size	171227_65pc_1C 1	2018-01-03 11:19:11	191.6	0.074	204	0	0	100	0	0	201.9	1825.2
10	Size	171227_65pc_1C 2	2018-01-03 11:19:50	208.5	0.087	223.6	0	0	100	0	0	221	1802.8
11	Size	171227_65pc_1C 3	2018-01-03 11:20:29	224.8	0.002	235.6	0	0	100	0	0	233.3	1795.4
12	Size	171227_65pc_1C 4	2018-01-03 11:21:08	247.2	0.114	267.6	0	0	100	0	0	256.5	1716.6
13	Size	171227_65pc_1C 5	2018-01-03 11:21:46	242.1	0.116	262.5	0	0	100	0	0	253.5	1731.5
14	Size	171227_65pc_1C 6	2018-01-03 11:22:25	244.4	0.217	321	123.4	0	86.6	13.4	0	162	1696.3
15	Size	171227_65pc_1C 7	2018-01-03 11:23:04	280.9	0.194	285.8	0	0	100	0	0	274.7	1774
16	Size	171227_65pc_1C 8	2018-01-03 11:23:42	251	0.253	221.4	670.7	0	70.2	29.8	0	215.4	1685
17	Size	171227_65pc_1C 1	2018-01-03 11:34:58	174	0.338	203.9	0	0	100	0	0	201.8	1188.5
18	Size	171227_65pc_1C 2	2018-01-03 11:35:36	212.7	0.302	251.2	0.6818	0	93.6	6.4	0	0.6641	1195.5
19	Size	171227_65pc_1C 3	2018-01-03 11:36:15	228.7	0.313	269.8	0.7026	0	93.9	6.1	0	0.6904	1164.6
20	Size	171227_65pc_1C 4	2018-01-03 11:36:54	309	0.007	332	0.8278	0	93.6	6.4	0	0.8254	1173.9
21	Size	171227_65pc_1C 5	2018-01-03 11:37:32	306.4	0.011	331.9	0.8972	0	93.7	6.3	0	0.875	1136
22	Size	171227_65pc_1C 6	2018-01-03 11:38:11	318.4	0.292	449.3	135.7	1.004	83	11	6	0.9894	1159.9
23	Size	171227_65pc_1C 7	2018-01-03 11:38:50	332.7	0.338	412.9	127.6	0.9166	81.8	11.1	7.1	0.8929	1142.6
24	Size	171227_65pc_1C 8	2018-01-03 11:39:28	335.6	0.362	316.3	4070	1.004	76.6	17.1	6.2	0.9894	1109
25	Size	171227_65pc_1C 1	2018-01-03 11:50:43	214	0.2	200.3	0	0	100	0	0	198.7	1136.9
26	Size	171227_65pc_1C 2	2018-01-03 11:51:21	267.6	0.27	308.2	0.6585	0	94.4	5.6	0	0.6446	1192.3
27	Size	171227_65pc_1C 3	2018-01-03 11:52:00	328	0.077	360.2	0.7195	0	94.1	5.9	0	0.7234	1173.8
28	Size	171227_65pc_1C 4	2018-01-03 11:52:39	426.9	0.168	425.4	0.8936	0	94	6	0	0.8547	1164.7
29	Size	171227_65pc_1C 5	2018-01-03 11:53:18	382.7	0.07	415.8	0.8785	0	93.9	6.1	0	0.8613	1165.6
30	Size	171227_65pc_1C 6	2018-01-03 11:53:56	404.1	0.212	475.4	0	0	100	0	0	459	1134.2
31	Size	171227_65pc_1C 7	2018-01-03 11:54:35	437.4	0.341	680.2	174.9	0.9872	79.2	15.1	5.7	0.9803	1177.9
32	Size	171227_65pc_1C 8	2018-01-03 11:55:13	449.5	0.32	730.4	201.1	1.044	76.4	18.6	5	1.018	1182.1

## Sheet: A1 60
Record	Type	Sample Name	Measurement Date and Time	Z-Ave	PdI	Pk 1 Mean Int	Pk 2 Mean Int	Pk 3 Mean Int	Pk 1 Area Int	Pk 2 Area Int	Peak 3 Area Intensity	Number Mean	Derived Count Rate
				d.nm		d.nm	d.nm	d.nm	%	%	%	d.nm	kcps
1	Size	171223_60pc_1C 1	2017-12-28 09:27:56	217.3	0.29	250.4	0.835	0	94.5	5.5	0	0.8385	1462.7
2	Size	171223_60pc_1C 2	2017-12-28 09:28:35	223.7	0.182	254.4	0.866	0	94.3	5.7	0	0.8537	1422
3	Size	171223_60pc_1C 3	2017-12-28 09:29:14	255.4	0.188	292.5	1.019	0	94	6	0	0.9984	1384.5
4	Size	171223_60pc_1C 4	2017-12-28 09:29:52	262	0.137	298.3	1.117	0	93.4	6.6	0	1.123	1310.9
5	Size	171223_60pc_1C 5	2017-12-28 09:30:31	270.4	0.192	312.5	1.187	0	93.1	6.9	0	1.161	1262.5
6	Size	171223_60pc_1C 6	2017-12-28 09:31:10	287.9	0.052	320.2	1.09	0	93.3	6.7	0	1.071	1306
7	Size	171223_60pc_1C 7	2017-12-28 09:31:48	287.2	0.338	302.4	1.247	0	92.4	7.6	0	1.219	1210.2
8	Size	171223_60pc_1C 8	2017-12-28 09:32:27	288.3	0.319	388.1	1.142	0	92.3	7.7	0	1.098	1173.5
9	Size	171223_60pc_1C 1	2017-12-28 10:15:49	277	0.19	322.3	0.9603	0	92.7	7.3	0	0.9595	1221.3
10	Size	171223_60pc_1C 2	2017-12-28 10:16:28	313	0.01	350	1.017	0	92.7	7.3	0	0.9971	1188.1
11	Size	171223_60pc_1C 3	2017-12-28 10:17:07	337.3	0.218	397.6	1.135	0	92.7	7.3	0	1.131	1194.1
12	Size	171223_60pc_1C 4	2017-12-28 10:17:45	346.9	0.23	411.6	1.269	0	92.4	7.6	0	1.25	1155
13	Size	171223_60pc_1C 5	2017-12-28 10:18:24	357.1	0.364	435.3	1.148	0	91.5	8.5	0	1.083	1125.6
14	Size	171223_60pc_1C 6	2017-12-28 10:19:02	357.3	0.382	384	1.201	0	90.1	9.9	0	1.172	1077.4
15	Size	171223_60pc_1C 7	2017-12-28 10:19:41	403.7	0.278	456.6	1.349	0	92.4	7.6	0	1.285	1101.7
16	Size	171223_60pc_1C 8	2017-12-28 10:20:20	435.9	0.332	585.4	1.247	0	92.3	7.7	0	1.215	1136.7
17	Size	171223_60pc_1C 1	2017-12-28 10:58:36	366.8	0.106	422.1	1.192	0	92.2	7.8	0	1.165	1237.3
18	Size	171223_60pc_1C 2	2017-12-28 10:59:14	288	0.352	339.8	0.9649	0	91.6	8.4	0	0.9701	1189
19	Size	171223_60pc_1C 3	2017-12-28 10:59:53	420.3	0.359	467.5	1.293	0	91	9	0	1.298	1203
20	Size	171223_60pc_1C 4	2017-12-28 11:00:31	411.7	0.291	489	1.293	0	92.1	7.9	0	1.231	1164.8
21	Size	171223_60pc_1C 5	2017-12-28 11:01:10	391.7	0.203	466.7	1.26	0	91.3	8.7	0	1.236	1132.8
22	Size	171223_60pc_1C 6	2017-12-28 11:01:48	415.3	0.277	506.5	1.335	0	91.2	8.8	0	1.188	1114
23	Size	171223_60pc_1C 7	2017-12-28 11:02:27	475.2	0.294	599.2	1.285	0	91.7	8.3	0	1.237	1123.1
24	Size	171223_60pc_1C 8	2017-12-28 11:03:06	400.1	0.235	484.8	1.267	0	90.6	9.4	0	1.247	1064.4

## Sheet: A2 Nucleated 50
Record	Type	Sample Name	Measurement Date and Time	Z-Ave	PdI	Pk 1 Mean Int	Pk 2 Mean Int	Pk 3 Mean Int	Pk 1 Area Int	Pk 2 Area Int	Peak 3 Area Intensity	Number Mean	Derived Count Rate
				d.nm		d.nm	d.nm	d.nm	%	%	%	d.nm	kcps
4	Size	180124_50pc_1C_nuc 1	2018-01-25 09:40:16	193.8	1	618.5	2.587	0	80.4	19.6	0	2.336	1062.9
5	Size	180124_50pc_1C_nuc 2	2018-01-25 09:40:54	304.2	0.633	612.5	2.485	0	81	19	0	2.276	1063.5
6	Size	180124_50pc_1C_nuc 3	2018-01-25 09:41:33	251.2	1	653.9	2.47	0	80.5	19.5	0	2.258	1061.6
7	Size	180124_50pc_1C_nuc 4	2018-01-25 09:42:12	301.4	0.625	614	2.45	0	80.5	19.5	0	2.257	1050.3
8	Size	180124_50pc_1C_nuc 5	2018-01-25 09:42:50	140.3	1	483	2.419	0	77.5	22.5	0	2.248	1027.3
9	Size	180124_50pc_1C_nuc 6	2018-01-25 09:43:29	139.1	1	309.2	2.184	0	76	24	0	2.049	1027
10	Size	180124_50pc_1C_nuc 7	2018-01-25 09:44:08	217.1	0.872	349.2	2.247	0	76.1	23.9	0	2.114	1033.7
11	Size	180124_50pc_1C_nuc 8	2018-01-25 09:44:46	235.6	0.628	454	2.338	0	77.5	22.5	0	2.2	994.4
12	Size	180124_50pc_1C_nuc 9	2018-01-25 09:45:25	152.2	0.996	216.6	2.119	5089	63.5	23	13.5	2.011	1010.3
13	Size	180124_50pc_1C_nuc 10	2018-01-25 09:46:04	158.8	1	359.8	2.243	0	74.2	25.8	0	2.084	997.5
14	Size	180124_50pc_1C_nuc 11	2018-01-25 09:46:43	222.3	0.911	441.2	2.268	0	78.1	21.9	0	2.128	996.2
15	Size	180124_50pc_1C_nuc 12	2018-01-25 09:47:22	247.4	0.889	603	2.441	0	78.3	21.7	0	2.246	985.9
16	Size	180124_50pc_1C_nuc 13	2018-01-25 09:48:00	232.3	1	395.7	2.304	5560	72.5	25.8	1.7	2.157	975.2
17	Size	180124_50pc_1C_nuc 14	2018-01-25 09:48:39	173.6	0.874	252	2.097	5425	70.3	25.4	4.3	1.974	991.2
18	Size	180124_50pc_nuc 1	2018-01-26 07:59:13	3947	0.388	4308	0	0	100	0	0	4271	3515.1
19	Size	180124_50pc_nuc 2	2018-01-26 07:59:52	5027	1	4287	0	0	100	0	0	4243	3460.9
20	Size	180124_50pc_nuc 3	2018-01-26 08:00:30	6827	1	5222	0	0	100	0	0	5243	3614.5
21	Size	180124_50pc_nuc 4	2018-01-26 08:01:09	6292	1	5357	2.242	0	91	9	0	2.157	3467.5
22	Size	180124_50pc_nuc 5	2018-01-26 08:01:48	9736	1	2.284	68.06	0	76.3	23.7	0	2.18	3643.8
23	Size	180124_50pc_nuc 6	2018-01-26 08:02:27	5411	0.237	5325	2.558	0	92.7	7.3	0	2.472	3614.1
24	Size	180124_50pc_nuc 7	2018-01-26 08:03:05	3449	0.017	4181	0	0	100	0	0	4135	3535.2
25	Size	180124_50pc_nuc 8	2018-01-26 08:03:44	5112	1	4470	0	0	100	0	0	4450	3701.3
26	Size	180124_50pc_nuc 9	2018-01-26 08:04:23	3411	1	3179	0	0	100	0	0	3102	3620.4
27	Size	180124_50pc_nuc 10	2018-01-26 08:05:01	4196	1	4190	0	0	100	0	0	4146	3541.8
28	Size	180124_50pc_nuc 11	2018-01-26 08:05:40	5795	0.28	5560	1.953	43.82	67.3	18.9	13.8	1.893	3590.6
29	Size	180124_50pc_nuc 12	2018-01-26 08:06:19	3244	0.131	3533	0	0	100	0	0	3458	3688.6
30	Size	180124_50pc_nuc 13	2018-01-26 08:06:57	5254	1	4716	0	0	100	0	0	4707	3767.4
31	Size	180124_50pc_nuc 14	2018-01-26 08:07:36	5045	1	4662	0	0	100	0	0	4649	3783.6
32	Size	180124_50pc_nuc 1	2018-01-26 08:13:53	3817	0.61	3898	0	0	100	0	0	3850	3165.3
33	Size	180124_50pc_nuc 2	2018-01-26 08:14:32	5276	1	4251	0	0	100	0	0	4208	3249.7
34	Size	180124_50pc_nuc 3	2018-01-26 08:15:10	5028	1	4433	0	0	100	0	0	4410	3179
35	Size	180124_50pc_nuc 4	2018-01-26 08:15:49	4421	0.585	4450	0	0	100	0	0	4430	3330.7
36	Size	180124_50pc_nuc 5	2018-01-26 08:16:28	5499	0.082	5341	2.161	0	91	9	0	2.108	3182.9
37	Size	180124_50pc_nuc 6	2018-01-26 08:17:06	5800	1	5040	2.456	0	94.2	5.8	0	2.332	3311.5
38	Size	180124_50pc_nuc 7	2018-01-26 08:17:45	2929	0.172	3439	0	0	100	0	0	3360	3416.8
39	Size	180124_50pc_nuc 8	2018-01-26 08:18:24	2670	0.151	3127	0	0	100	0	0	3039	3260.1
40	Size	180124_50pc_nuc 9	2018-01-26 08:19:03	3415	0.146	4022	0	0	100	0	0	3970	3202.9
41	Size	180124_50pc_nuc 10	2018-01-26 08:19:41	4298	0.105	5380	58.77	1.343	74.5	17.4	8.1	1.325	3224.5
42	Size	180124_50pc_nuc 11	2018-01-26 08:20:20	4144	0.241	4653	0	0	100	0	0	4641	3231.4
43	Size	180124_50pc_nuc 12	2018-01-26 08:20:59	3736	0.225	4457	0	0	100	0	0	4437	3264.5
44	Size	180124_50pc_nuc 13	2018-01-26 08:21:37	4904	0.022	5347	45.69	1.596	86.8	7.2	6.1	1.56	3302.5
45	Size	180124_50pc_nuc 14	2018-01-26 08:22:16	5633	0.18	5560	43.82	1.661	68.6	17.3	14	1.62	3305.8
46	Size	180124_50pc_nuc 1	2018-01-26 08:26:47	3900	0.327	4868	47.62	0	93.9	6.1	0	46.44	3346.7
47	Size	180124_50pc_nuc 2	2018-01-26 08:27:26	4217	0.43	4915	0	0	100	0	0	4925	3163.2
48	Size	180124_50pc_nuc 3	2018-01-26 08:28:05	7010	1	5560	27.92	1.393	58.6	23.9	17.5	1.358	3327.9
49	Size	180124_50pc_nuc 4	2018-01-26 08:28:43	8450	1	39.62	1.432	0	53.1	46.9	0	1.386	3188.5
50	Size	180124_50pc_nuc 5	2018-01-26 08:29:22	5463	0.046	5537	1.959	43.82	76.8	14.1	9.2	1.876	3105.5
51	Size	180124_50pc_nuc 6	2018-01-26 08:30:01	5951	0.855	5552	57.92	1.829	68.1	16.1	15.9	1.765	3152
52	Size	180124_50pc_nuc 7	2018-01-26 08:30:40	6934	1	5359	2.182	0	89.4	10.6	0	2.125	3150
53	Size	180124_50pc_nuc 8	2018-01-26 08:31:19	6142	0.355	5420	2.425	0	86.9	13.1	0	2.284	3179.4
54	Size	180124_50pc_nuc 9	2018-01-26 08:31:57	7037	0.368	1.887	100.8	0	52.1	47.9	0	1.838	3268.7
55	Size	180124_50pc_nuc 10	2018-01-26 08:32:36	6039	0.572	5419	1.913	87.93	82.7	9.8	7.4	1.864	3202.6
56	Size	180124_50pc_nuc 11	2018-01-26 08:33:15	8295	0.599	2.106	91.28	0	66.2	33.8	0	2.016	3123.1
57	Size	180124_50pc_nuc 12	2018-01-26 08:33:54	5669	0.169	5560	2.343	0	81	19	0	2.227	2811.5
58	Size	180124_50pc_nuc 13	2018-01-26 08:34:32	4190	0.35	4632	2.182	0	94	6	0	2.124	2995.7
59	Size	180124_50pc_nuc 14	2018-01-26 08:35:11	3751	0.401	3863	0	0	100	0	0	3813	3167.7

[truncated: 10 more sheets: A2 1.1C 85, A2 1.2C 85, A2 1.3C 85, A2 1.1C 75, A2 1.2C 75, A2 1.3C 75, A2 1.1C 65, A2 1.2C 65, A2 1.3C 65, A2 MeOH]
